# Supplementary figures and images for: Dopamine neurons projecting to the posterior striatum form an anatomically distinct subclass
Source: eLife journal article supplement (doi:10.7554/elife.10032), 2015-08-31

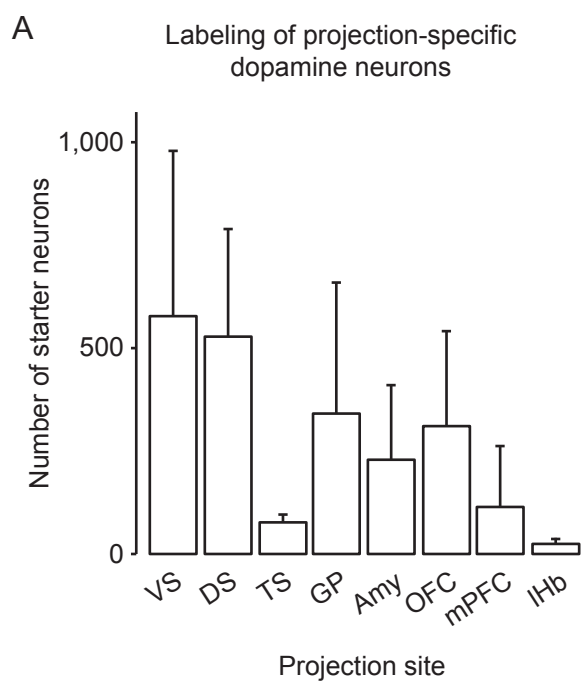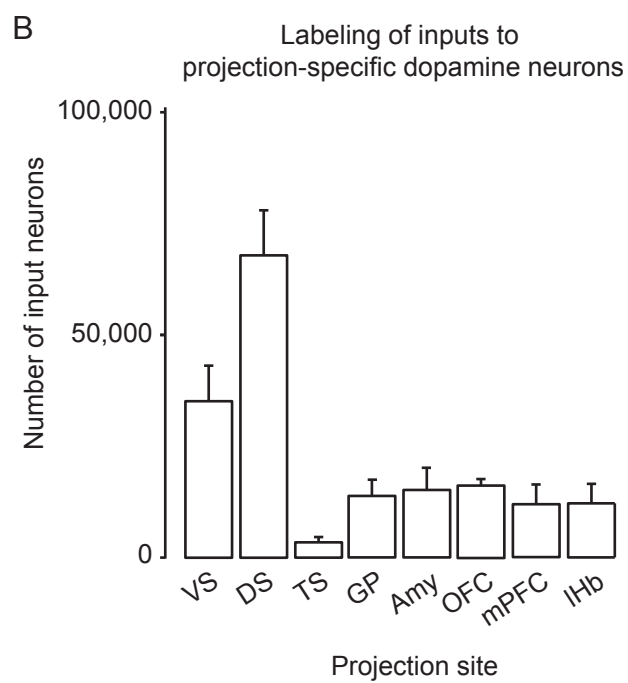

Supplement: supp [file elife_poa_e10032_Figure_1_figure_supplement_1.pdf › elife_poa_e10032_Figure_1_figure_supplement_1.pdf]

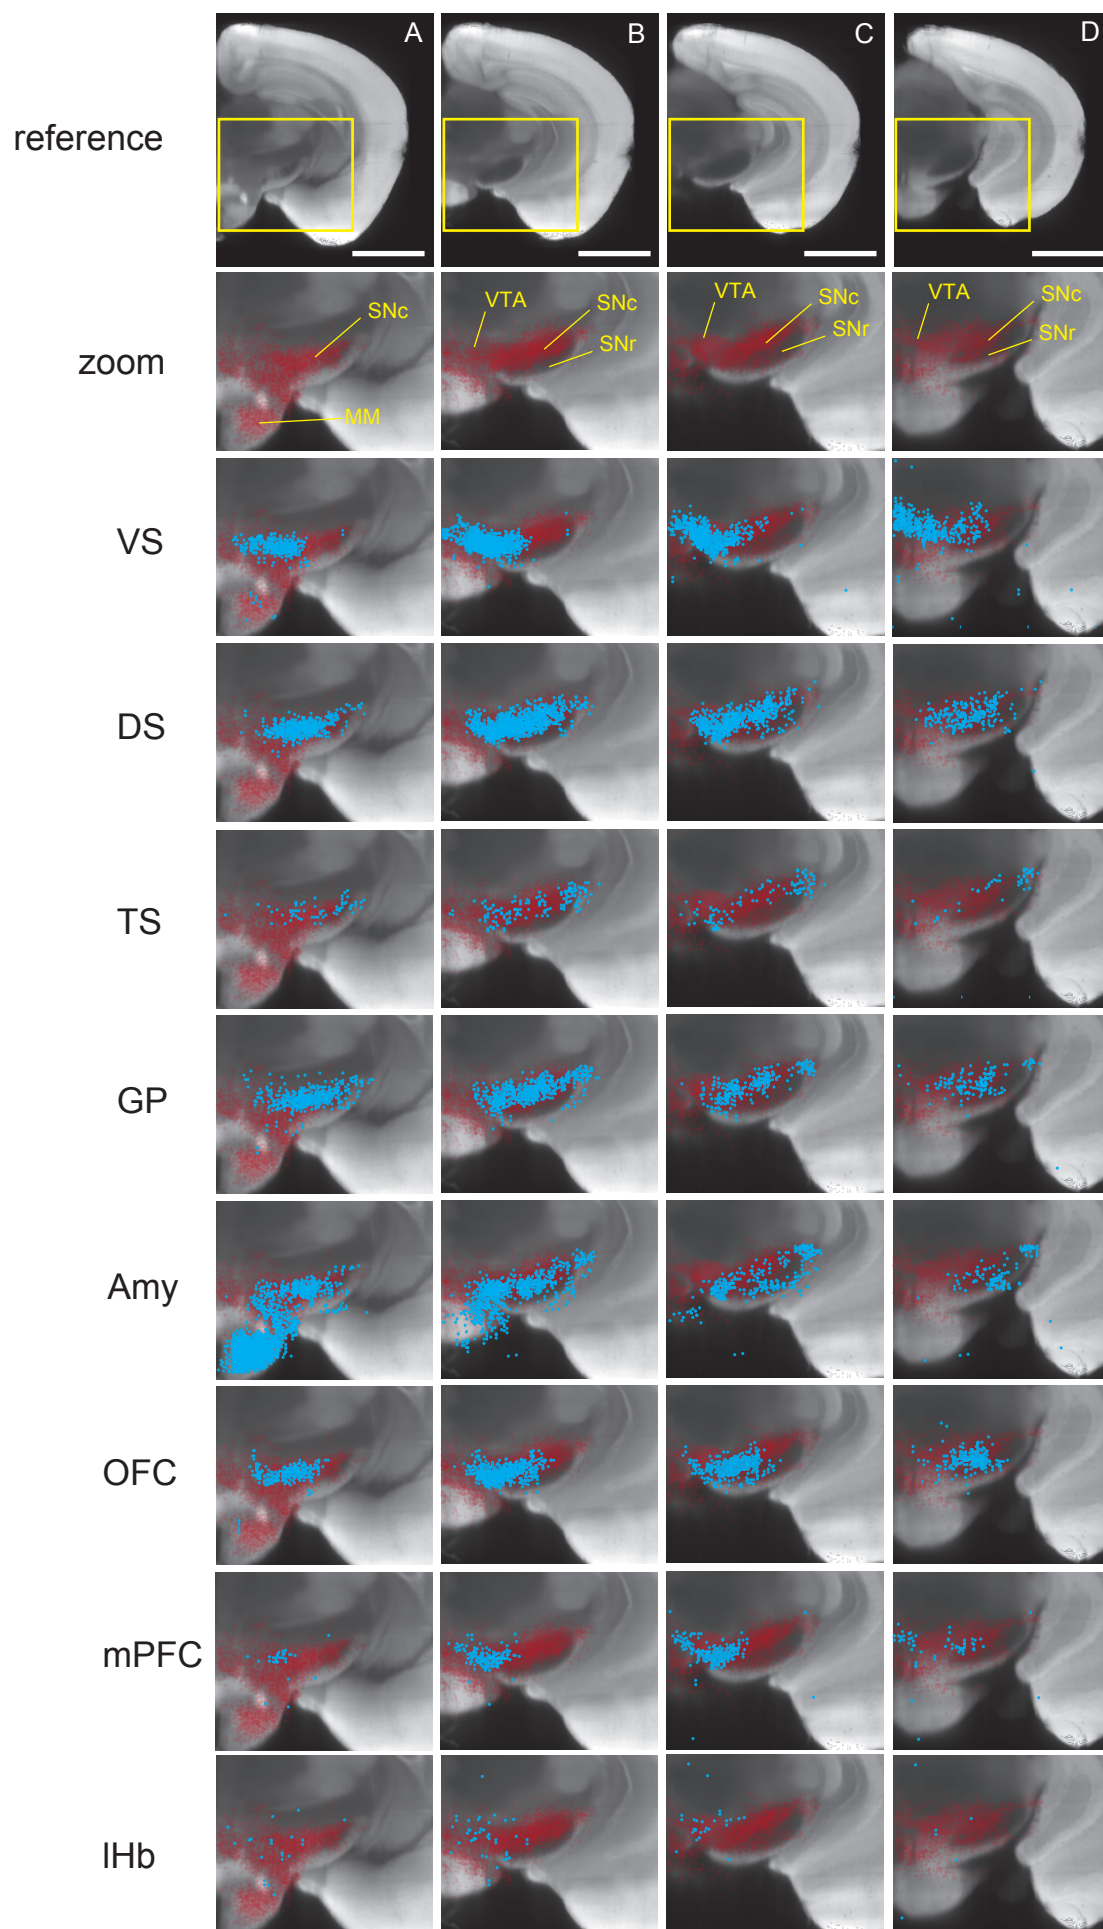

Supplement: supp [file elife_poa_e10032_Figure_3_figure_supplement_1.pdf › elife_poa_e10032_Figure_3_figure_supplement_1.pdf]

VS

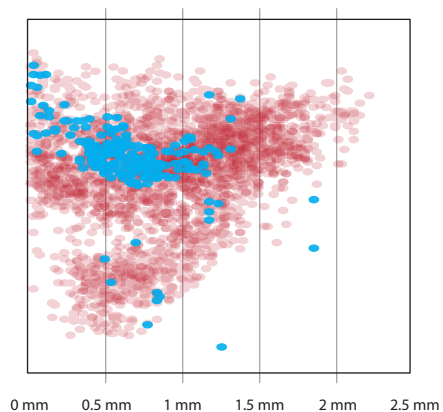

Amy

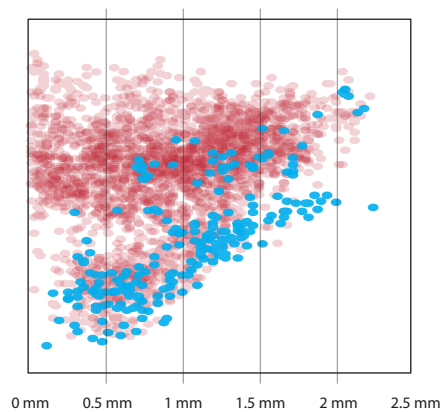

DS

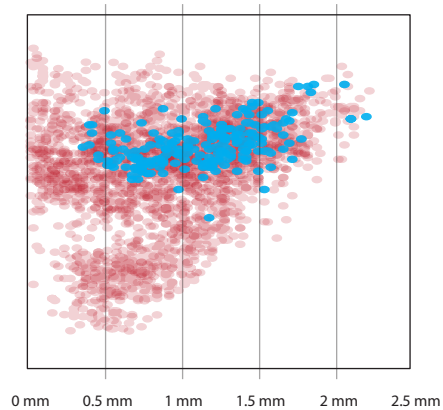

OFC

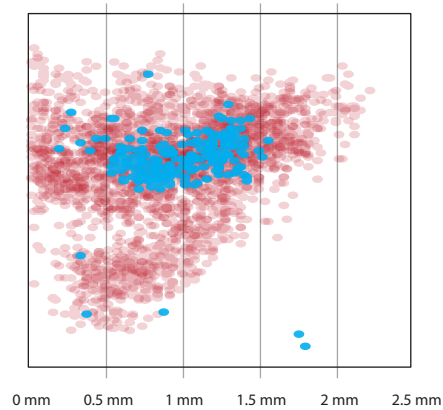

TS

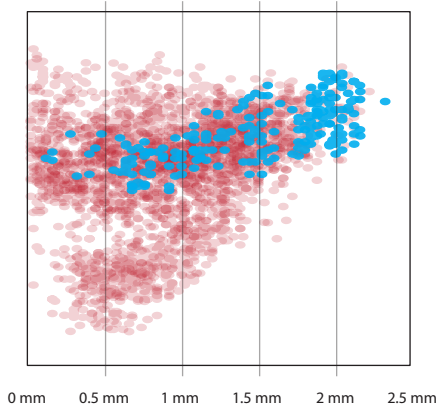

mPFC

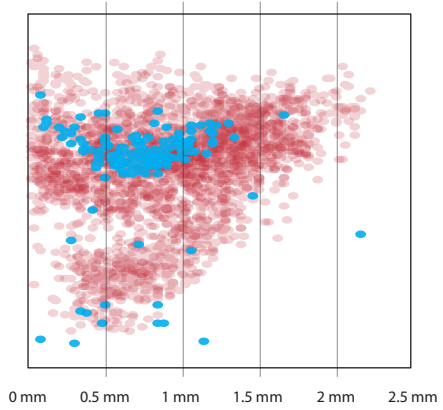

GP

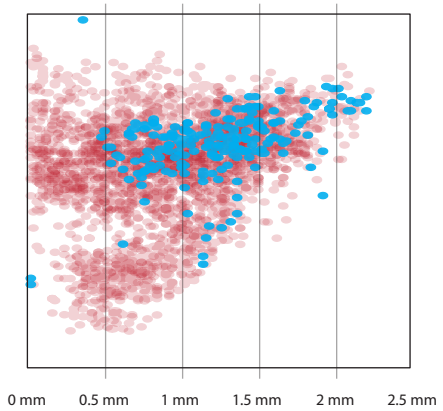

IHb

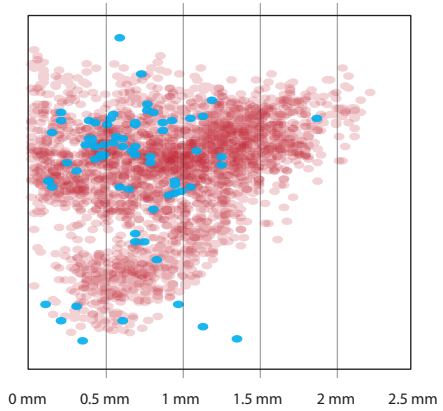

Supplement: supp [file elife_poa_e10032_Figure_3_figure_supplement_2.pdf › elife_poa_e10032_Figure_3_figure_supplement_2.pdf]

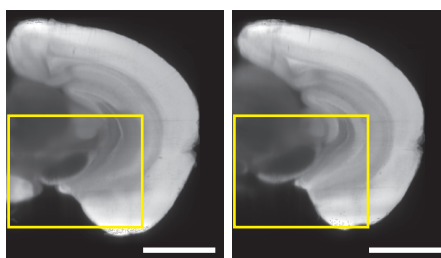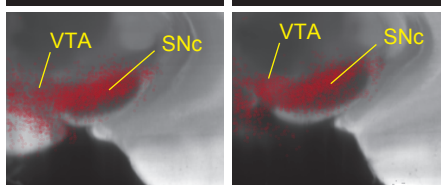

VS (-RG)

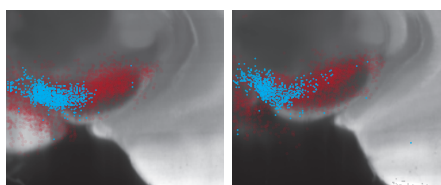

VS (+RG)

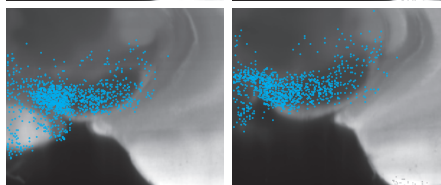

DS (-RG)

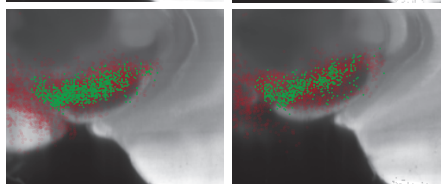

DS (+RG)

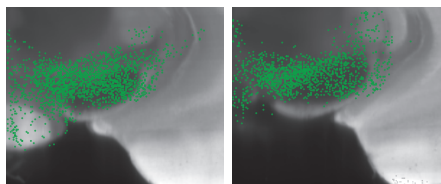

TS (-RG)

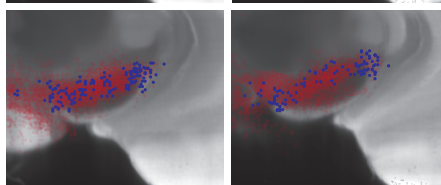

TS (+RG)

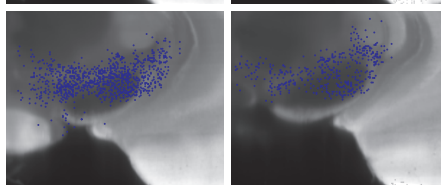

Supplement: supp [file elife_poa_e10032_Figure_3_figure_supplement_3.pdf › elife_poa_e10032_Figure_3_figure_supplement_3.pdf]

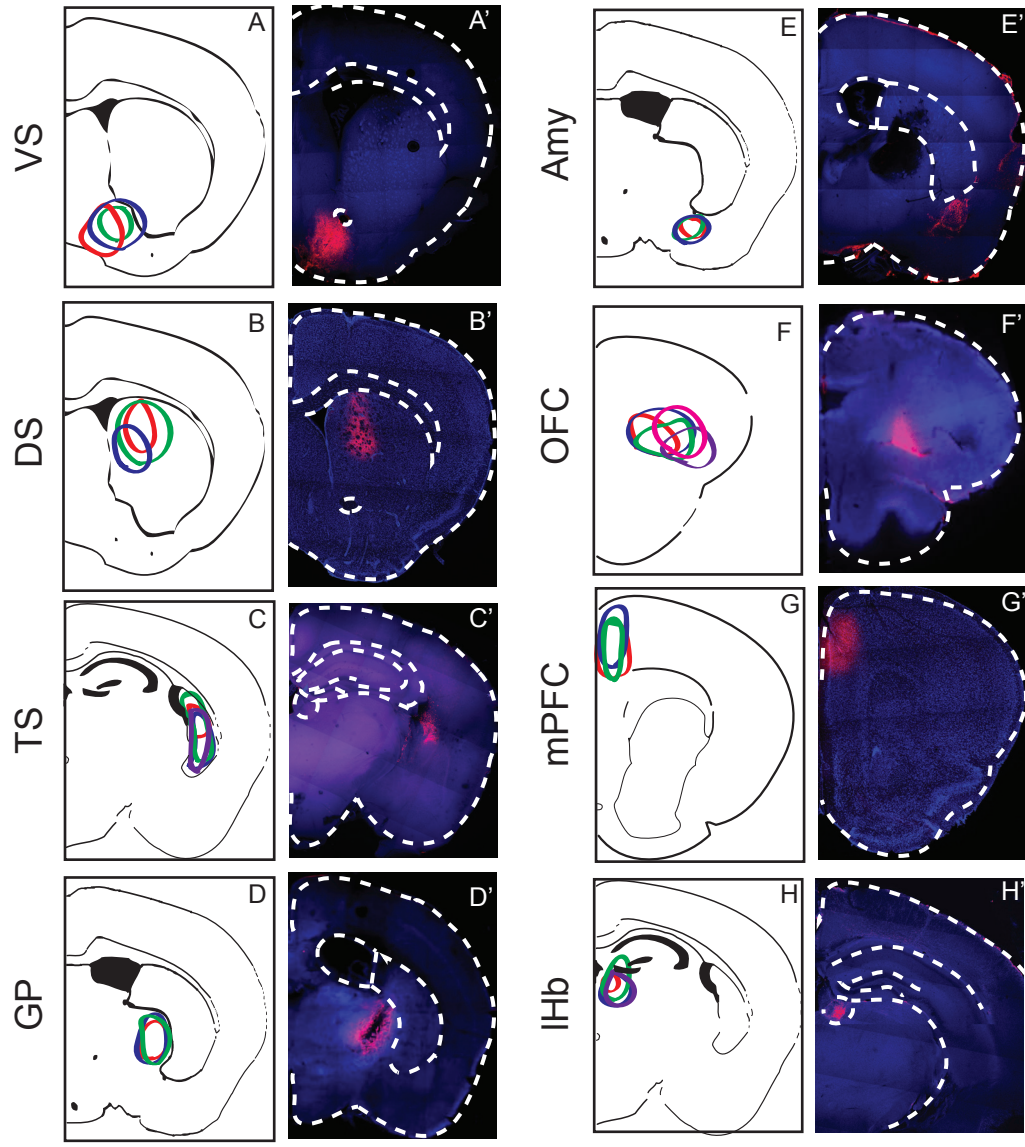

Supplement: supp [file elife_poa_e10032_Figure_3_figure_supplement_4.pdf › elife_poa_e10032_Figure_3_figure_supplement_4.pdf]

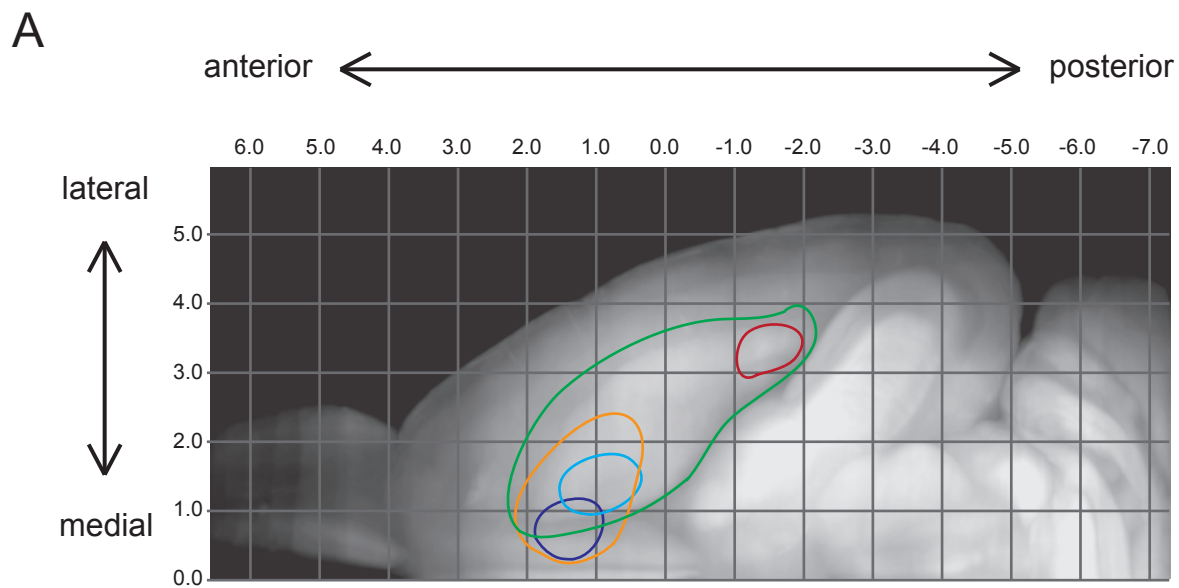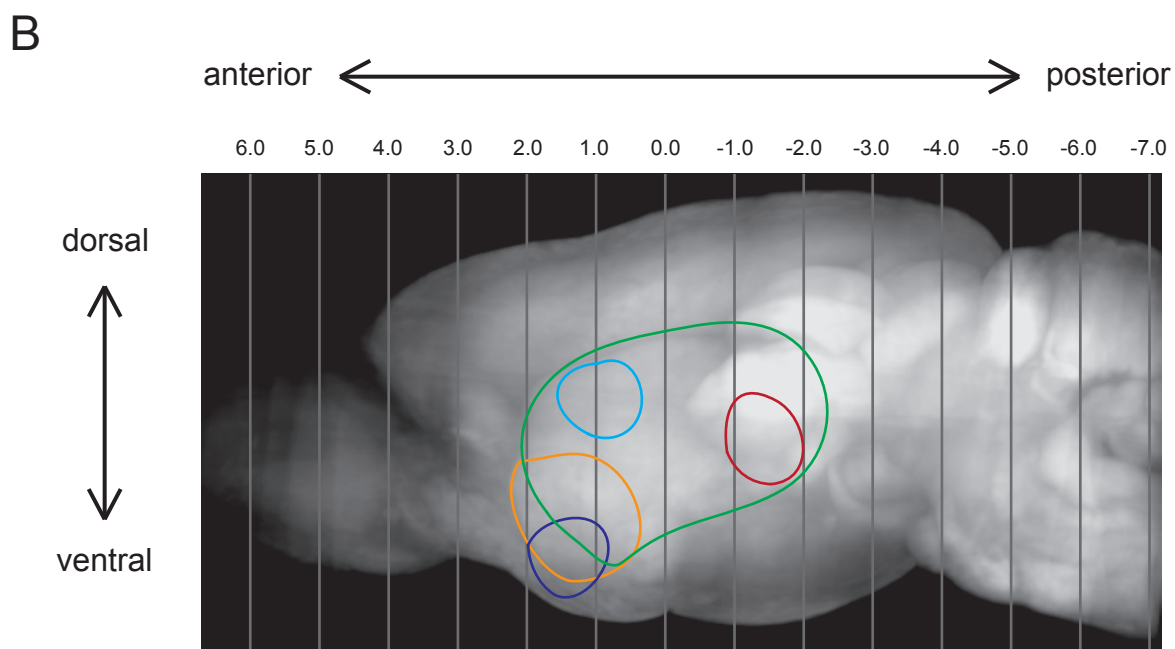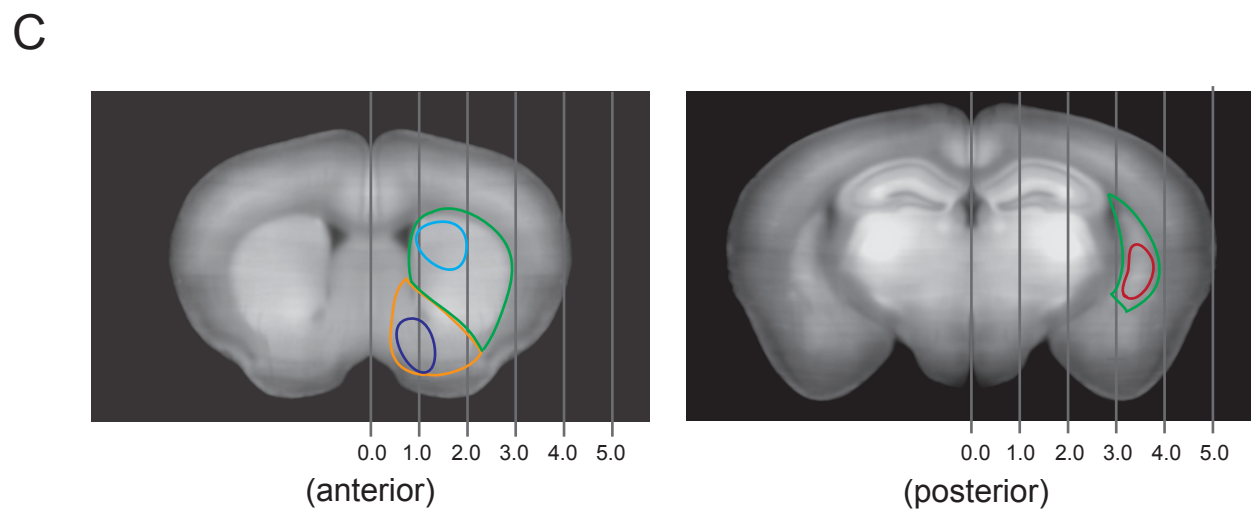

Supplement: supp [file elife_poa_e10032_Figure_3_figure_supplement_5.pdf › elife_poa_e10032_Figure_3_figure_supplement_5.pdf]

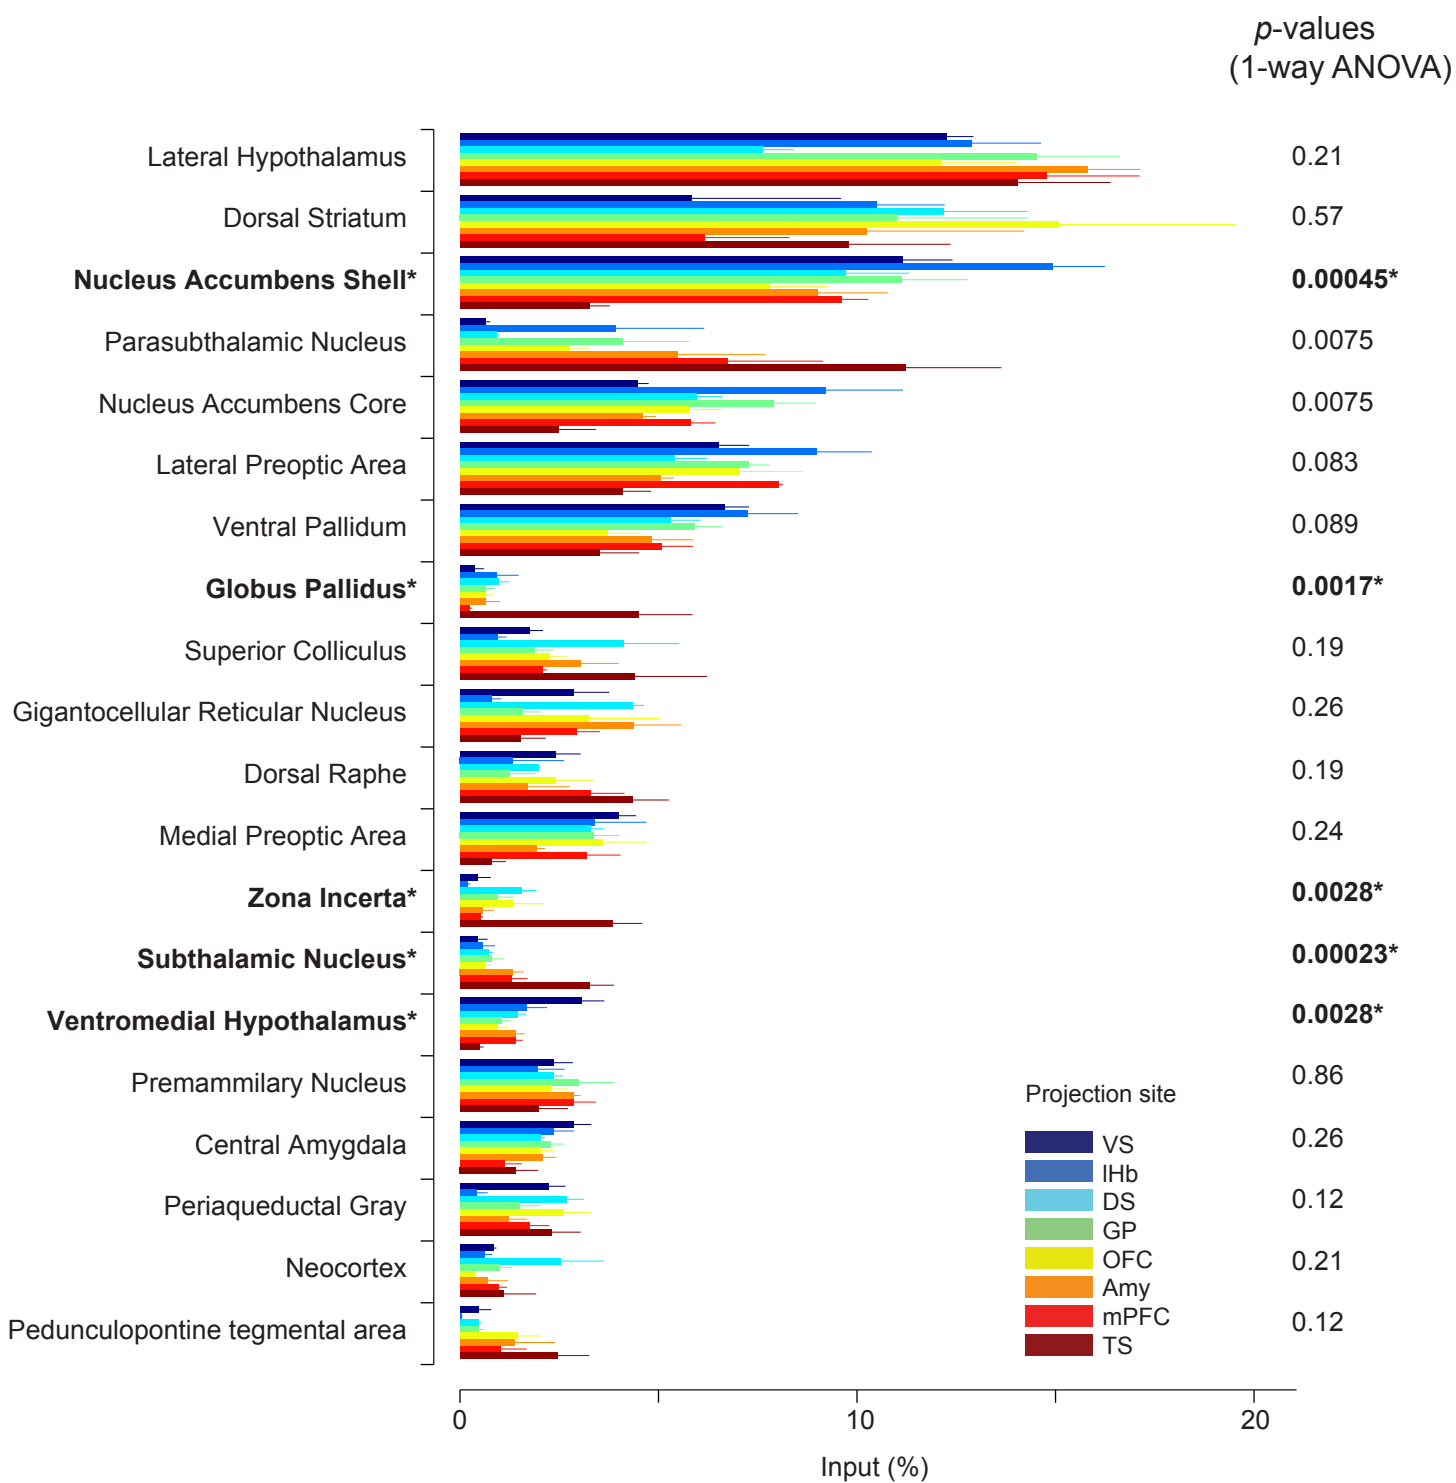

(\* Significant after Holm-Sidak correction for multiple comparisons)

Supplement: supp [file elife_poa_e10032_Figure_4_figure_supplement_1.pdf › elife_poa_e10032_Figure_4_figure_supplement_1.pdf]

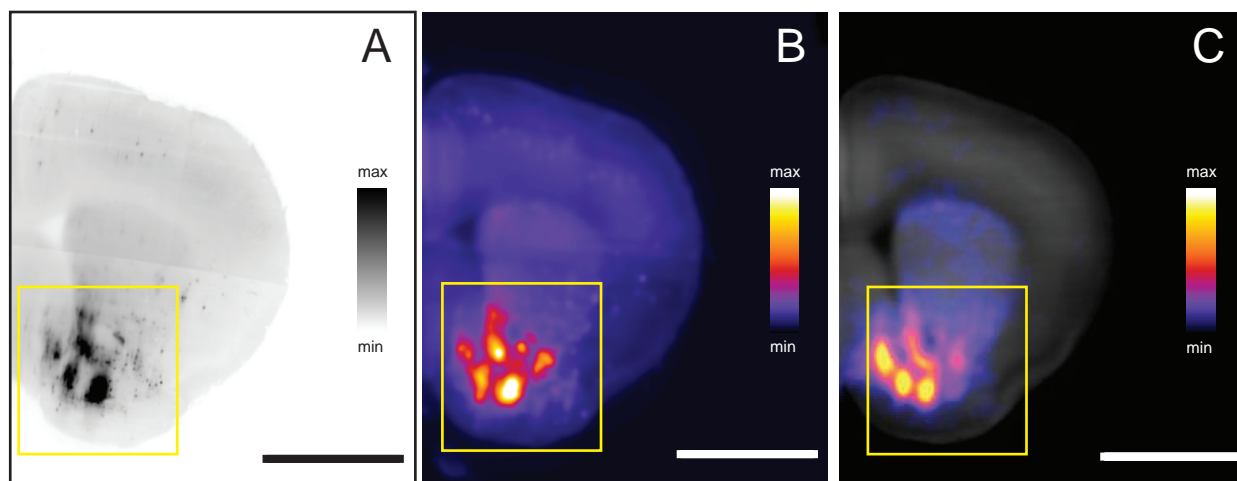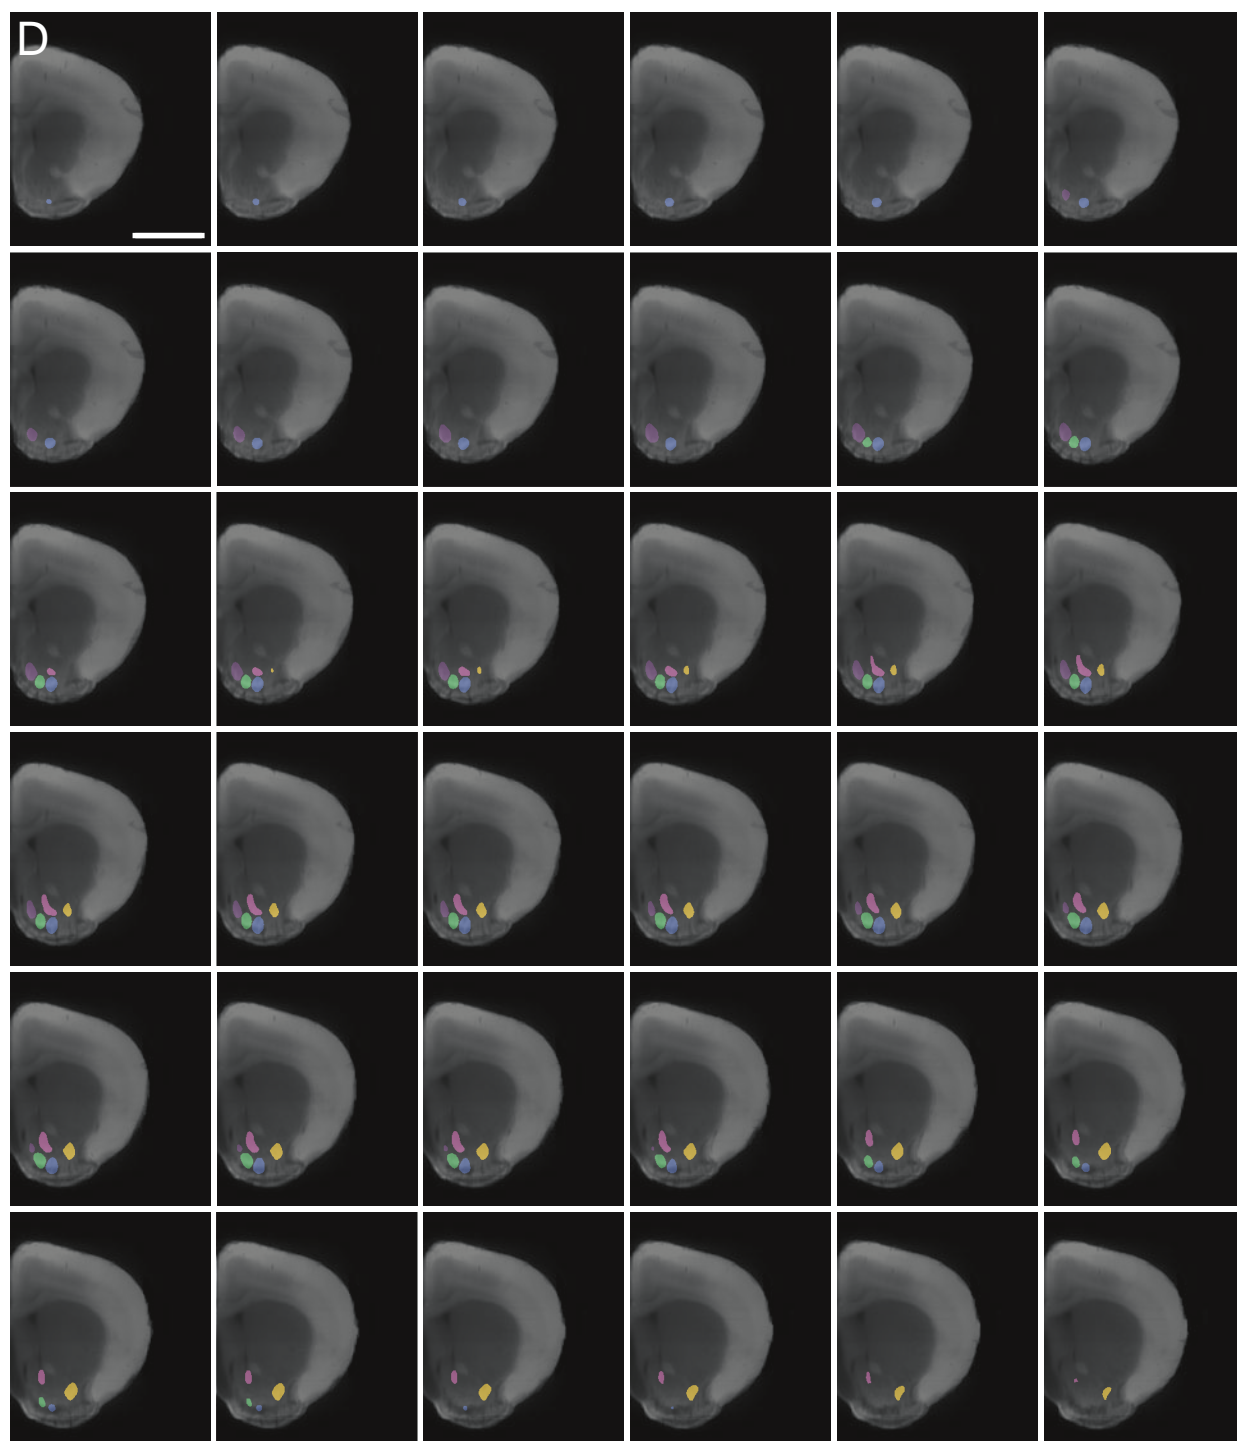

Supplement: supp [file elife_poa_e10032_Figure_7_figure_supplement_1.pdf › elife_poa_e10032_Figure_7_figure_supplement_1.pdf]
